# Supplementary material for: Development of a Convenient In Vivo Hepatotoxin Assay Using a Transgenic Zebrafish Line with Liver-Specific DsRed Expression
Source: PubMed Central journal article supplement (PMC3953600; doi:10.1371/journal.pone.0091874), 2014-03-13
Supplement: pone.0091874.s001.pdf [file pone.0091874.s001.pdf]

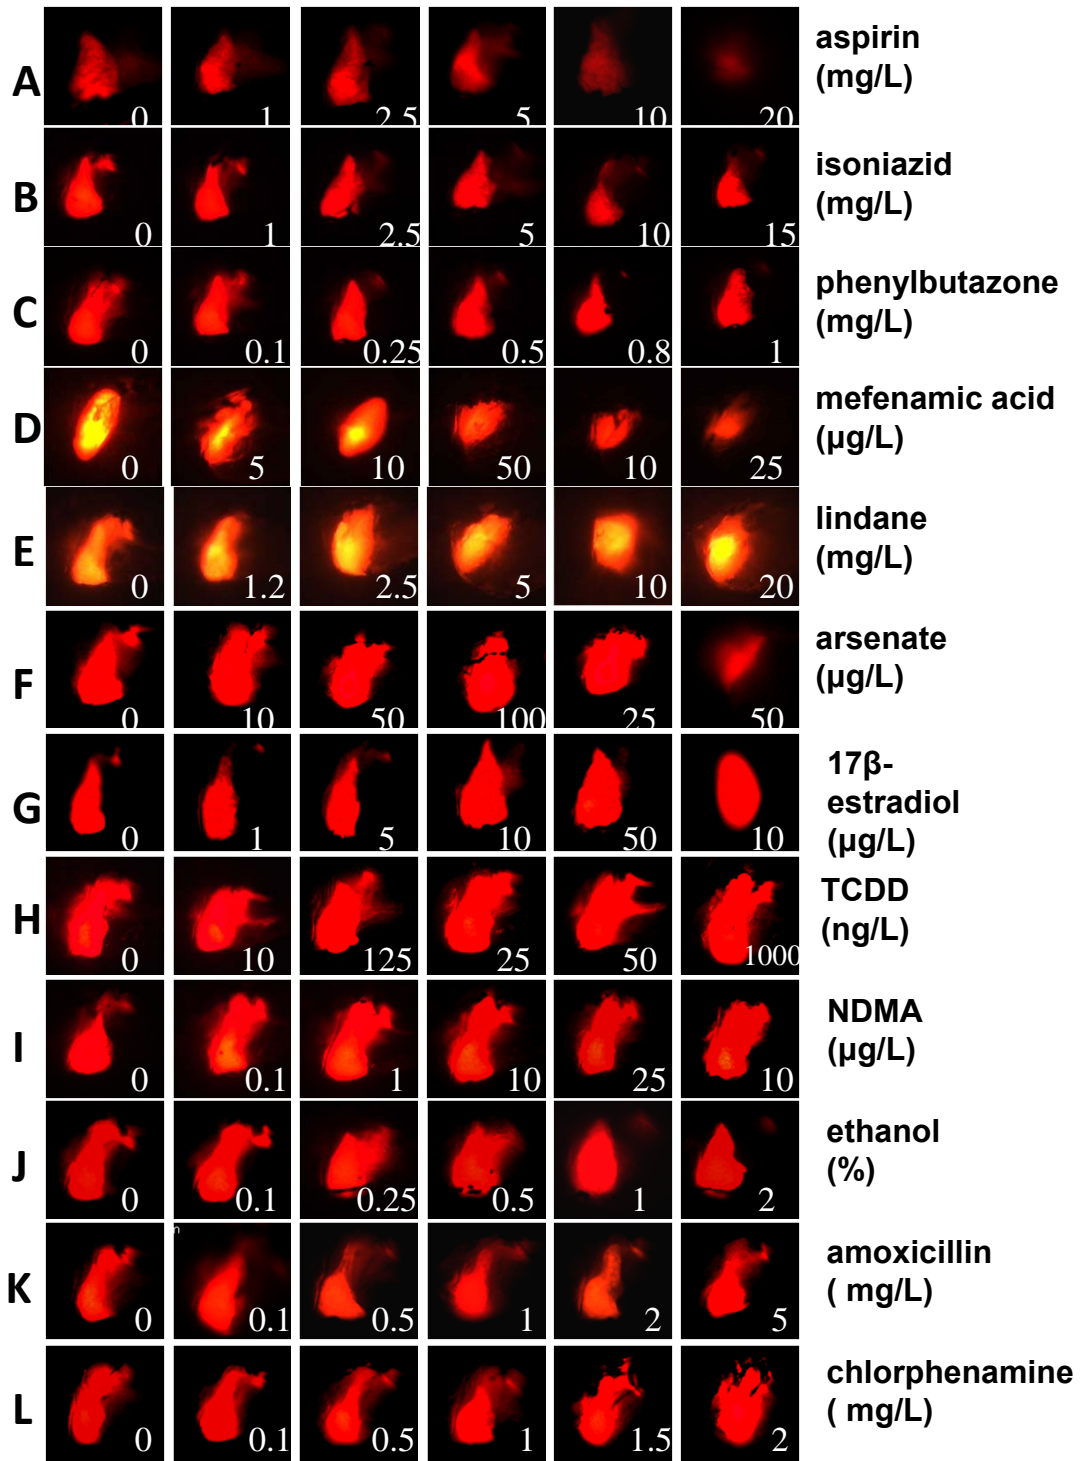

**Figure S1. Liver-specific RFP expression from representative fry treated with various chemicals at different concentrations. (A-L) Treatments with different chemicals as indicated on the right. Each row represents each chemical and concentrations are indicated within each panel. 0 indicates control groups with 0.01% DMSO except for the controls for arsenate and ethanol groups where the controls were egg water.**
