# Supplementary material for: Development of a Convenient In Vivo Hepatotoxin Assay Using a Transgenic Zebrafish Line with Liver-Specific DsRed Expression
Source: PubMed Central journal article supplement (PMC3953600; doi:10.1371/journal.pone.0091874), 2014-03-13
Supplement: pone.0091874.s002.pdf [file pone.0091874.s002.pdf]

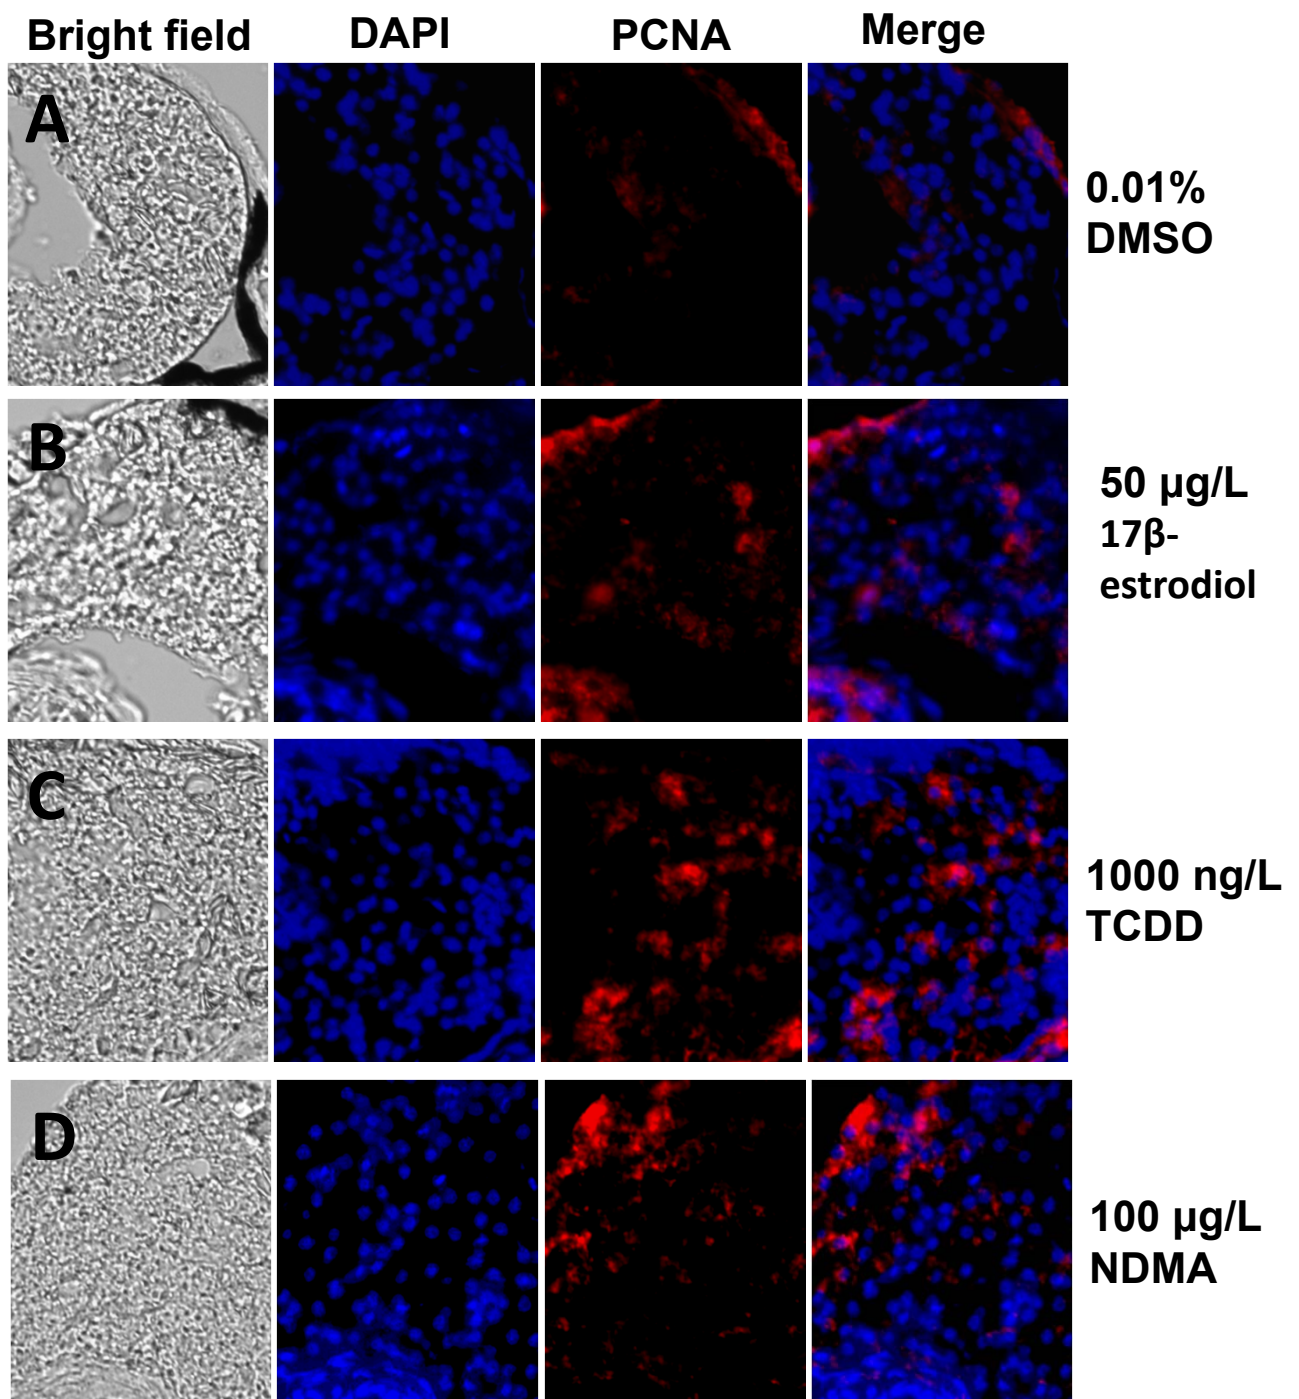

**Figure S2. Increased hepatocyte proliferation induced by 17 $\beta$ -estradiol (B), TCDD (C) and NDMA (D).** Zebrafish larvae were treated 50  $\mu$ g/L 17 $\beta$ -estradiol, 1000 ng/L TCDD or 100  $\mu$ g/L NDMA from 3 dpf to 5 dpf and liver cryo-sections were prepared and stained by DAPI and PCNA. Increased numbers of proliferating hepatocytes were noted from 17 $\beta$ -estradiol, TCDD and NDMA treatment groups compared to the 0.01% DMSO vehicle control group.
