# Supplementary material for: Development of a Convenient In Vivo Hepatotoxin Assay Using a Transgenic Zebrafish Line with Liver-Specific DsRed Expression
Source: PubMed Central journal article supplement (PMC3953600; doi:10.1371/journal.pone.0091874), 2014-03-13
Supplement: pone.0091874.s003.pdf [file pone.0091874.s003.pdf]

**Table S1. Selected chemical treatment studies in zebrafish**

| Chemicals      | Concentrations                                                                                                                                                                         |
|----------------|----------------------------------------------------------------------------------------------------------------------------------------------------------------------------------------|
| Acetaminophen  | 0.1-1000 $\mu$ M (0.015-151.16 mg/L) in zebrafish larva [1]<br>2- 6 mM (302.32-906.96 mg/L) in zebrafish embryos [2]<br>5-10 mM (755.81-1511.63 mg/L) in zebrafish embryos / adult [3] |
| Aspirin        | 0.1- 1000 $\mu$ M (0.018-180.16mg/L) in zebrafish larva [1]<br>200 mg/L in zebrafish embryos [4]                                                                                       |
| Isoniazid      | 20–320 $\mu$ g/L in zebrafish embryos [5]                                                                                                                                              |
| Phenylbutazone | No zebrafish data available.                                                                                                                                                           |
| Mefenamic acid | 10-60 $\mu$ M (2.41-14.46 mg/L) in zebrafish adult[6]<br>0.25-17.16 mg/L in zebrafish embryos [7]                                                                                      |
| Lindane        | 40-150 $\mu$ g/L in zebrafish embryos [8]<br>80 $\mu$ g/L in zebrafish embryos [9]                                                                                                     |
| Arsenate       | 0.05-15 mg /L in zebrafish adult[10],<br>LC50: 56 mg/L in zebrafish adult [11]                                                                                                         |
| Estradiol      | 0.05-10 ng /L in zebrafish embryos [12]<br>5 -100 ng/L in zebrafish adult [13]                                                                                                         |
| TCDD           | 0.1-10 nM( 32.20-3219.7 ng/L) in zebrafish embryos / adult [14] [15]                                                                                                                   |
| NDMA           | 50 mg/L in 8-week-old zebrafish [16]                                                                                                                                                   |
| Ethanol        | 1.5% in zebrafish adult [17]<br>0.1-2% in zebrafish adult [18]                                                                                                                         |
| Amoxicillin    | 75-1125 mg/L, in zebrafish embryos, 48h premature hatching<br>EC50=132.4 mg/L [19]                                                                                                     |
| Chlorphenamine | No zebrafish data available.                                                                                                                                                           |

**References:**

1. He JH, Guo SY, Zhu F, Zhu JJ, Chen YX, et al. (2013) A zebrafish phenotypic assay for assessing drug-induced hepatotoxicity. *J Pharmacol Toxicol Methods* 67: 25-32.
2. Weigt S, Huebler N, Braunbeck T, von Landenberg F, Broschard TH (2010) Zebrafish teratogenicity test with metabolic activation (mDarT): effects of phase I activation of acetaminophen on zebrafish *Danio rerio* embryos. *Toxicology* 275: 36-49.
3. North TE, Babu IR, Vedder LM, Lord AM, Wishnok JS, et al. (2010) PGE2-regulated wnt signaling and N-acetylcysteine are synergistically hepatoprotective in zebrafish acetaminophen injury. *Proceedings of the National Academy of Sciences of the United States of America* 107: 17315-17320.
4. Praskova E, Zivna D, Stepanova S, Sevcikova M, Blahova J, et al. (2012) Acute toxicity of acetylsalicylic acid to juvenile and embryonic stages of *Danio rerio*. *Neuro Endocrinol*

Lett 33 Suppl 3: 72-76.

5. Strecker R, Weigt S, Braunbeck T (2013) Cartilage and bone malformations in the head of zebrafish (*Danio rerio*) embryos following exposure to disulfiram and acetic acid hydrazide. *Toxicol Appl Pharmacol* 268: 221-231.
6. Nadanaciva S, Aleo MD, Strock CJ, Stedman DB, Wang H, et al. (2013) Toxicity assessments of nonsteroidal anti-inflammatory drugs in isolated mitochondria, rat hepatocytes, and zebrafish show good concordance across chemical classes. *Toxicol Appl Pharmacol* 272: 272-280.
7. Collard HR, Ji K, Lee S, Liu X, Kang S, et al. (2013) Toxicity and endocrine disruption in zebrafish (*Danio rerio*) and two freshwater invertebrates (*Daphnia magna* and *Moina macrocopa*) after chronic exposure to mefenamic acid. *Ecotoxicol Environ Saf* 94: 80-86.
8. Gorge G, Nagel R (1990) Toxicity of lindane, atrazine, and deltamethrin to early life stages of zebrafish (*Brachydanio rerio*). *Ecotoxicol Environ Saf* 20: 246-255.
9. Ensenbach U, Nagel R (1995) Toxicity of complex chemical mixtures: acute and long-term effects on different life stages of zebrafish (*Brachydanio rerio*). *Ecotoxicol Environ Saf* 30: 151-157.
10. Baldissarelli LA, Capiotti KM, Bogo MR, Ghisleni G, Bonan CD (2012) Arsenic alters behavioral parameters and brain ectonucleotidases activities in zebrafish (*Danio rerio*). *Comp Biochem Physiol C Toxicol Pharmacol* 155: 566-572.
11. Liu F, Gentles A, Theodorakis CW (2008) Arsenate and perchlorate toxicity, growth effects, and thyroid histopathology in hypothyroid zebrafish *Danio rerio*. *Chemosphere* 71: 1369-1376.
12. Segner H, Navas JM, Schafers C, Wenzel A (2003) Potencies of estrogenic compounds in in vitro screening assays and in life cycle tests with zebrafish in vivo. *Ecotoxicol Environ Saf* 54: 315-322.
13. Versonnen BJ, Arijs K, Verslycke T, Lema W, Janssen CR (2003) In vitro and in vivo estrogenicity and toxicity of o-, m-, and p-dichlorobenzene. *Environ Toxicol Chem* 22: 329-335.
14. Li ZH, Xu H, Zheng W, Lam SH, Gong Z (2013) RNA-Sequencing Analysis of TCDD-Induced Responses in Zebrafish Liver Reveals High Relatedness to In Vivo Mammalian Models and Conserved Biological Pathways. *PLoS One* 8: e77292.
15. Ton C, Lin Y, Willett C (2006) Zebrafish as a model for developmental neurotoxicity testing. *Birth Defects Res A Clin Mol Teratol* 76: 553-567.
16. Mizgireuv IV, Majorova IG, Gorodinskaya VM, Khudoley VV, Revskoy SY (2004) Carcinogenic effect of N-nitrosodimethylamine on diploid and triploid zebrafish (*Danio rerio*). *Toxicol Pathol* 32: 514-518.
17. Kashyap B, Pegorsch L, Frey RA, Sun C, Shelden EA, et al. (2013) Eye-Specific Gene Expression following Embryonic Ethanol Exposure in Zebrafish: Roles for Heat Shock Factor 1. *Reprod Toxicol*.
18. Chatterjee D, Shams S, Gerlai R (2014) Chronic and acute alcohol administration induced neurochemical changes in the brain: comparison of distinct zebrafish populations. *Amino Acids*.
19. Oliveira R, McDonough S, Ladewig JC, Soares AM, Nogueira AJ, et al. (2013) Effects of oxytetracycline and amoxicillin on development and biomarkers activities of zebrafish (*Danio rerio*). *Environ Toxicol Pharmacol* 36: 903-912.
